# Supplementary material for: Association between brachial-ankle pulse wave velocity and risk of type 2 diabetes mellitus: results from a cohort study
Source: PubMed Central journal article supplement — BMJ Open Diabetes Res Care. 2020 Jul 21;8(1):e001317. doi: 10.1136/bmjdrc-2020-001317 (PMC7375424; doi:10.1136/bmjdrc-2020-001317), 2020-07-21
Supplement: bmjdrc-2020-001317supp001.pdf [file bmjdrc-2020-001317supp001.pdf]

### Supplementary File

#### Association between brachial-ankle pulse wave velocity and risk of type 2 diabetes mellitus:

#### Results from a cohort study

Yan-mei Lou<sup>a,\*</sup>, PhD; Min-qi Liao<sup>b,\*</sup>, MPH; Chang-yi Wang<sup>c,\*</sup>, PhD; Hong-en Chen<sup>c</sup>, PhD; Xiao-lin Peng<sup>c</sup>, PhD; Dan Zhao<sup>c</sup>, PhD; Xu-ping Gao<sup>b</sup>, MBBS; Shan Xu<sup>c</sup>, PhD; Li Wang<sup>c</sup>, PhD; Jian-ping Ma<sup>c</sup>, PhD; Zhao Ping<sup>a,#</sup>, PhD; Fang-fang Zeng<sup>b,#</sup>, PhD.

**Supplementary Table 1.** Subgroup analyses in relation to tertiles of averaged ba-PWV with the T2DM incidence.

|                            | Person-year<br>(mean, year) | T1         | T2   |        |                | T3    |        |                | <i>P</i> interaction |                  |
|----------------------------|-----------------------------|------------|------|--------|----------------|-------|--------|----------------|----------------------|------------------|
|                            |                             | HR         | HR   | 95% CI | <i>P</i> trend | HR    | 95% CI | <i>P</i> trend |                      |                  |
| Sex                        |                             |            |      |        |                |       |        |                | 0.375                |                  |
| Male                       | 3.86                        | 1.00 (Ref) | 1.48 | 1.09   | 2.01           | 0.013 | 1.36   | 0.97           | 1.90                 | 0.072            |
| Female                     | 3.59                        | 1.00 (Ref) | 0.99 | 0.54   | 1.80           | 0.978 | 1.29   | 0.67           | 2.48                 | 0.452            |
| Age (year)                 |                             |            |      |        |                |       |        |                |                      | <b>&lt;0.001</b> |
| 20.0-44.9                  | 3.86                        | 1.00 (Ref) | 1.78 | 0.86   | 3.68           | 0.121 | 3.15   | 1.37           | 7.24                 | 0.007            |
| 45.0-64.9                  | 3.89                        | 1.00 (Ref) | 1.29 | 0.96   | 1.73           | 0.009 | 1.27   | 0.93           | 1.75                 | 0.134            |
| ≥65.0                      | 3.74                        | 1.00 (Ref) | 0.91 | 0.21   | 3.99           | 0.902 | 1.07   | 0.26           | 4.35                 | 0.928            |
| BMI (kg/m <sup>2</sup> ) * |                             |            |      |        |                |       |        |                |                      | 0.448            |
| 18.0-23.9                  | 3.78                        | 1.00 (Ref) | 1.10 | 0.68   | 1.76           | 0.701 | 1.02   | 0.69           | 1.50                 | 0.914            |
| 24.0-27.9                  | 3.83                        | 1.00 (Ref) | 1.00 | 0.71   | 1.41           | 0.991 | 0.91   | 0.66           | 1.26                 | 0.589            |
| ≥28.0                      | 3.64                        | 1.00 (Ref) | 1.09 | 0.86   | 1.37           | 0.488 | 1.03   | 0.83           | 1.28                 | 0.811            |
| TC (mmol/L)                |                             |            |      |        |                |       |        |                |                      | 0.241            |
| < 5.06 †                   | 3.58                        | 1.00 (Ref) | 1.41 | 0.93   | 2.14           | 0.108 | 1.62   | 1.02           | 2.56                 | 0.040            |
| ≥5.06                      | 3.99                        | 1.00 (Ref) | 1.41 | 0.98   | 2.00           | 0.061 | 1.17   | 0.79           | 1.72                 | 0.440            |
| Smoking status             |                             |            |      |        |                |       |        |                |                      | <b>0.006</b>     |
| Never                      | 3.67                        | 1.00 (Ref) | 1.36 | 0.96   | 1.92           | 0.084 | 1.15   | 0.77           | 1.73                 | 0.498            |
| Past                       | 4.01                        | 1.00 (Ref) | 1.19 | 0.66   | 2.15           | 0.554 | 1.05   | 0.57           | 1.95                 | 0.865            |
| Current                    | 3.82                        | 1.00 (Ref) | 2.10 | 1.07   | 4.11           | 0.030 | 2.77   | 1.39           | 5.53                 | 0.004            |
| Drinking status            |                             |            |      |        |                |       |        |                |                      | 0.132            |

|         |      |            |      |      |       |       |      |      |      |       |
|---------|------|------------|------|------|-------|-------|------|------|------|-------|
| Never   | 3.75 | 1.00 (Ref) | 1.60 | 1.04 | 2.47  | 0.031 | 1.76 | 1.10 | 2.81 | 0.018 |
| Past    | 3.95 | 1.00 (Ref) | 2.62 | 0.98 | 7.05  | 0.056 | 2.72 | 0.94 | 7.87 | 0.065 |
| Current | 3.75 | 1.00 (Ref) | 1.12 | 0.77 | 1.62  | 0.554 | 0.94 | 0.62 | 1.43 | 0.775 |
| Hs-CRP  |      |            |      |      |       |       |      |      |      | 0.146 |
| Without | 4.11 | 1.00 (Ref) | 1.36 | 1.02 | 1.79  | 0.033 | 1.32 | 0.97 | 1.79 | 0.077 |
| With    | 2.05 | 1.00 (Ref) | 3.20 | 1.01 | 10.18 | 0.048 | 2.62 | 0.76 | 9.02 | 0.126 |

Notes: All the data were adjusted for the covariates in model 3. *P* for trend, *P* value for trend across tertiles; *P* for interaction, *P* value for interaction across variables;

T1-T3, averaged ba-PWV values were divided into 3 tertiles:  $\leq 1253$  cm/s, 1253 – 1442 cm/s,  $> 1442$  cm/s; \* The BMI standard of China; † Mean value of TC.

Abbreviations: Ba-PWV, brachial-ankle pulse wave velocity; BMI, body mass index; T2DM, type 2 diabetes mellitus; TC, total cholesterol.

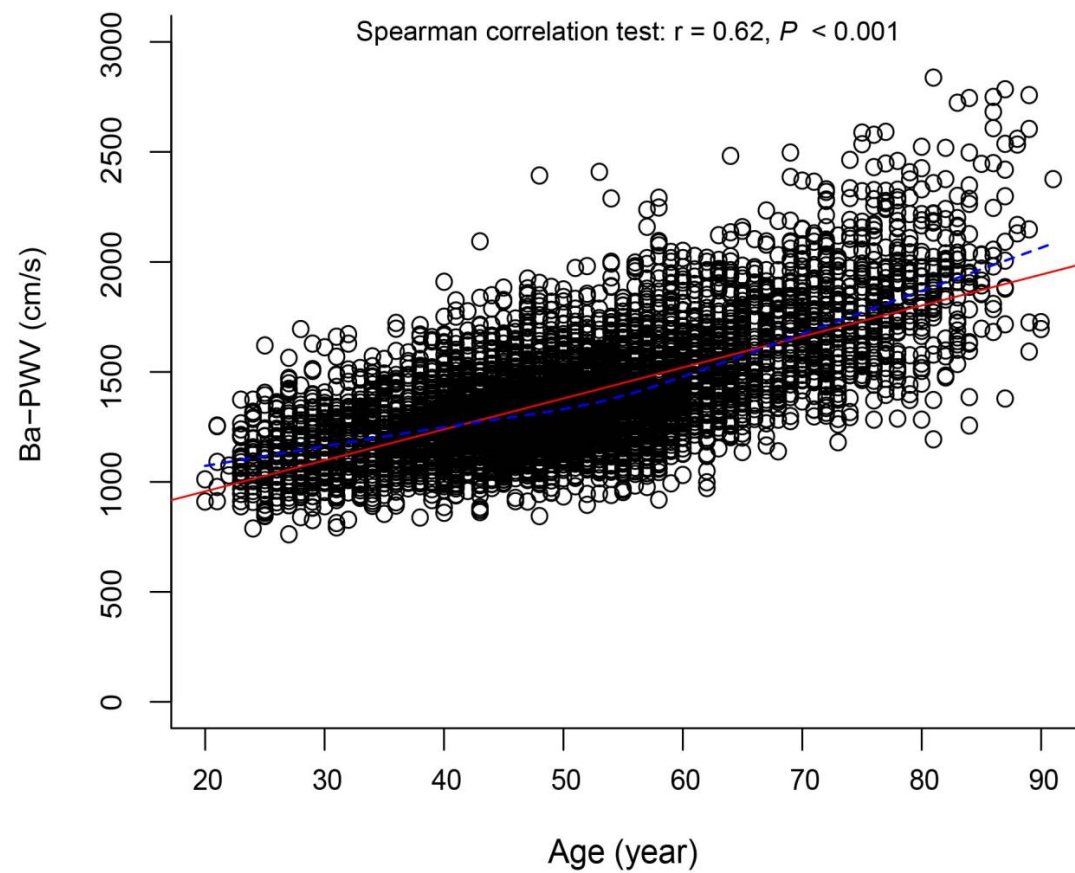

**Supplementary Figure 1.** Scatter plot showing correlation between ba-PWV levels and age.

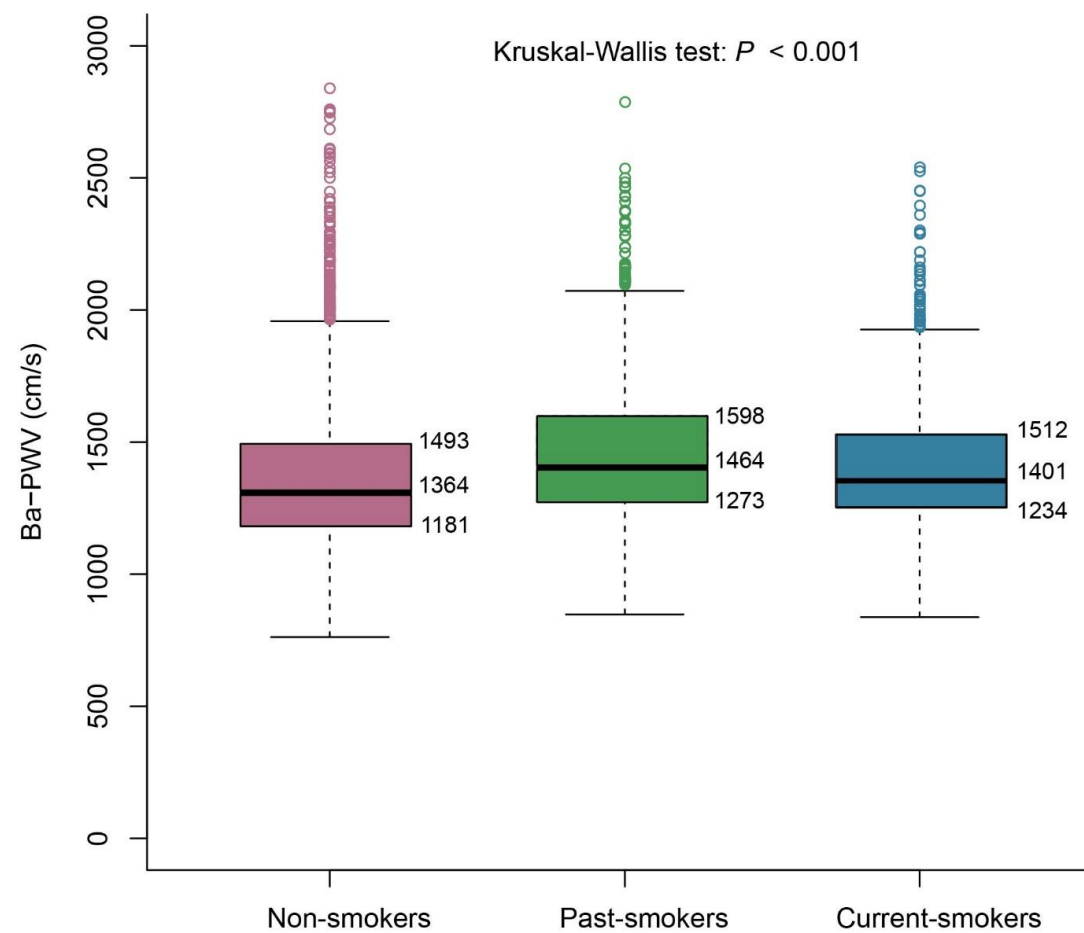

**Supplementary Figure 2.** Box plots of showing the distribution of ba-PWV levels of three smoking status groups.
